# Supplementary material for: Preparation of quasi-core/shell structured composite energetic materials to improve combustion performance
Source: Royal Society of Chemistry journal article supplement (doi:10.1039/d3ra02732e), 2023-01-01
Supplement: d3ra02732e1.pdf [file d3ra02732e1.pdf]

## Supporting information

### Preparation of quasi-core/shell structured composite energetic materials to improve the combustion performance

Ruihao Wang\*, Lanting Yang, Zhenwei Zhang, Wenkui Song, Dunju Wang, Changping Guo  
Co-Innovation Center for New Energetic Materials, Southwest University of Science and Technology, Mianyang  
621010, P. R. China.

#### Corresponding Author

\* E-mail: [ruihao0847@163.com](mailto:ruihao0847@163.com) (Ruihao Wang)

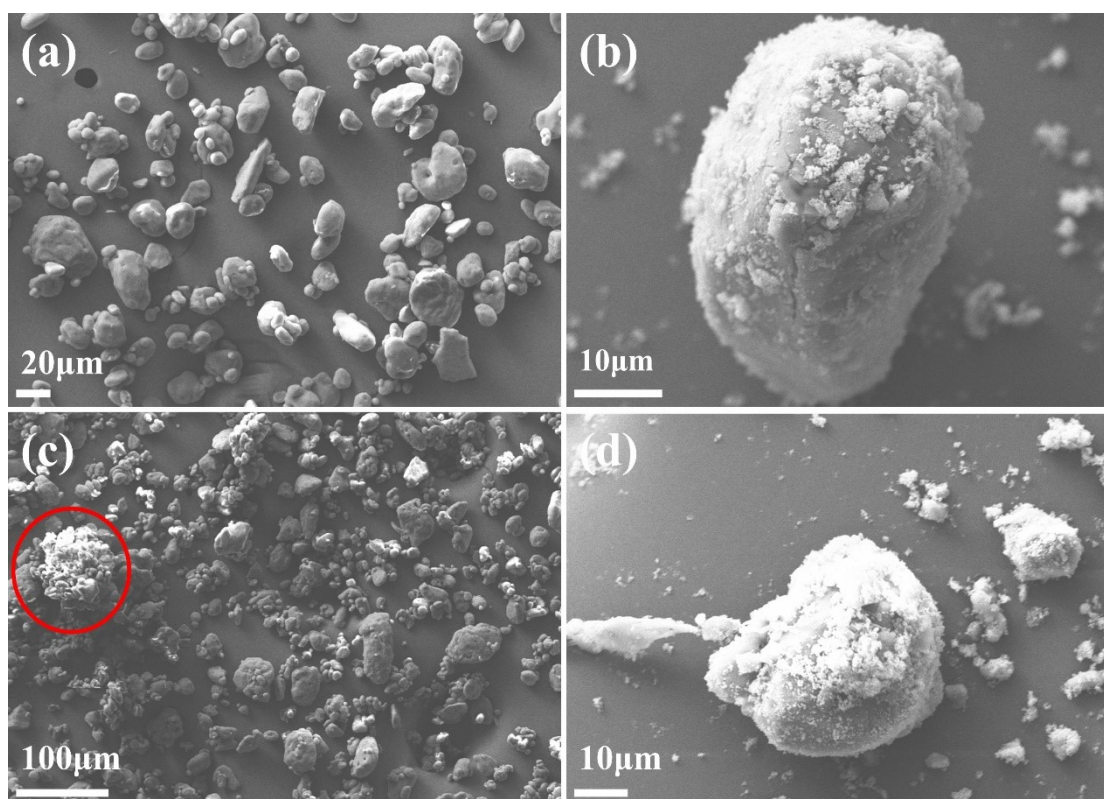

Fig. S1. SEM images of (a) pRDX-3h; (b) pRDX-3h@PTFE-Al; (c) pRDX-9h; (d) pRDX-9h@PTFE-Al

Table S1

Surface element composition of RDX, pRDX, and pRDX@PTFE-Al, as determined by XPS

| Samples      | C-1s (%) | N-1s (%) | O-1s (%) | Al-2p (%) | F-2p (%) | N/C  |
|--------------|----------|----------|----------|-----------|----------|------|
| RDX          | 32.11    | 24.64    | 43.26    | -         | -        | 0.77 |
| pRDX         | 34.76    | 23.66    | 41.58    | -         | -        | 0.68 |
| pRDX@PTFE-Al | 29.13    | 2.5      | 5.51     | 2.07      | 60.79    | 0.09 |

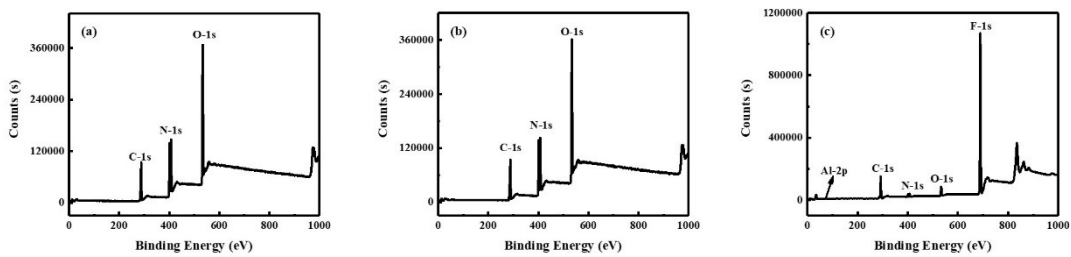

Fig. S2. XPS spectra of (a) raw RDX; (b) pRDX; (c) pRDX@PTFE-Al.

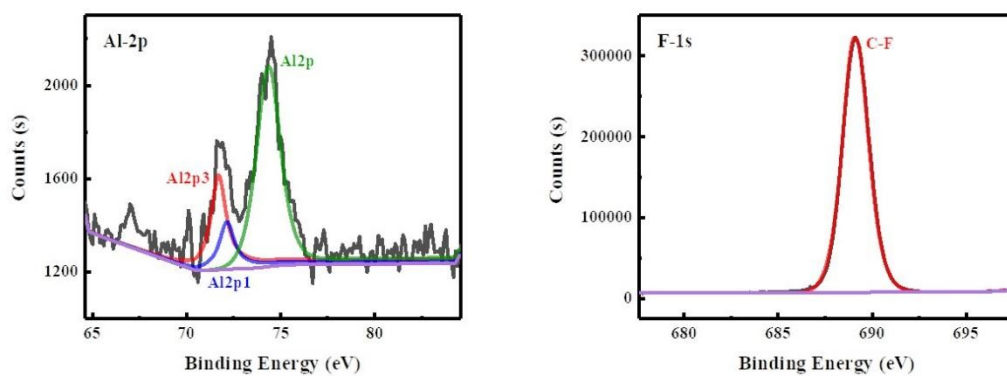

Fig. S3. High-resolution XPS spectra of Al and F elements in pRDX@PTFE-Al.

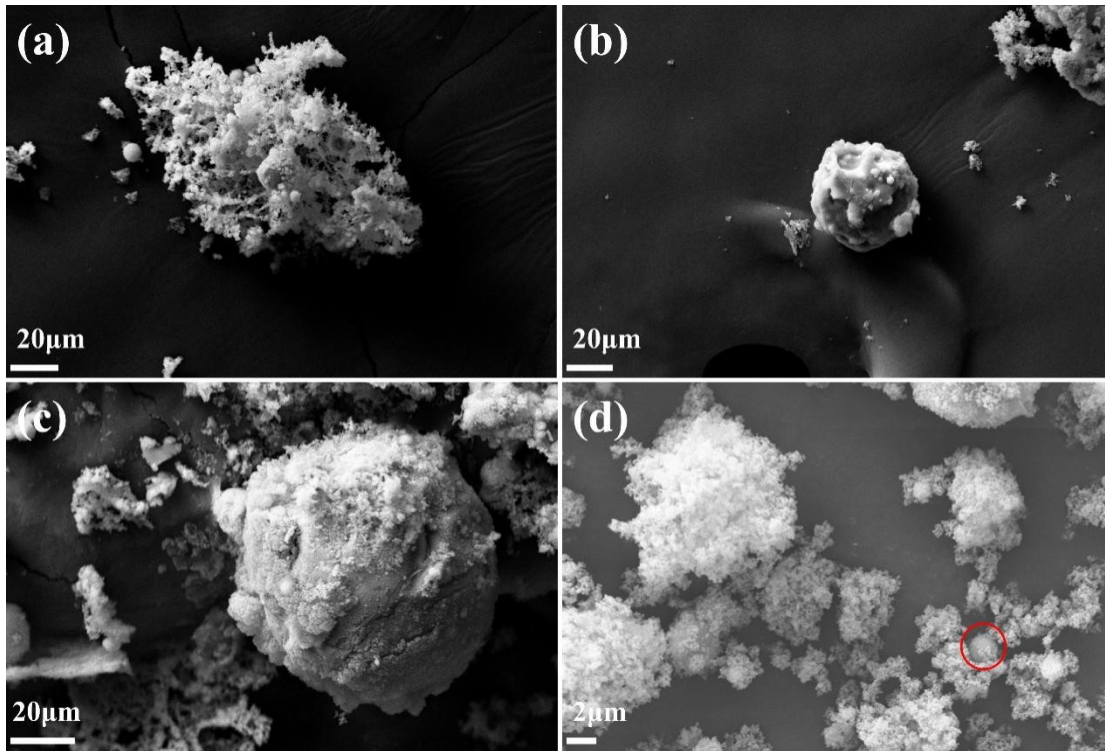

Fig. S4. SEM images of (a) (b) (c) combustion products; (d) raw Nano Al.
